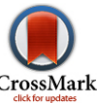

## Correction

# Correction: Towards the Conservation of Endangered Avian Species: A Recombinant West Nile Virus Vaccine Results in Increased Humoral and Cellular Immune Responses in Japanese Quail (*Coturnix japonica*)

The PLOS ONE Staff

The co-author, Dr. Joanne A. Young's name has been changed to Dr. Jay A. Young.

## Reference

1. Young JA, Jefferies W (2013) Towards the Conservation of Endangered Avian Species: A Recombinant West Nile Virus Vaccine Results in Increased Humoral and Cellular Immune Responses in Japanese Quail (*Coturnix japonica*). PLoS ONE 8(6): e67137. doi:10.1371/journal.pone.0067137.

**Citation:** The PLOS ONE Staff (2014) Correction: Towards the Conservation of Endangered Avian Species: A Recombinant West Nile Virus Vaccine Results in Increased Humoral and Cellular Immune Responses in Japanese Quail (*Coturnix japonica*). PLoS ONE 9(6): e99472. doi:10.1371/journal.pone.0099472

**Published:** June 3, 2014

**Copyright:** © 2014 The PLOS ONE Staff. This is an open-access article distributed under the terms of the Creative Commons Attribution License, which permits unrestricted use, distribution, and reproduction in any medium, provided the original author and source are credited.
